# Supplementary material
Source: PubMed Central journal article supplement (PMC6649687)
Supplement: NIHMS1517645-supplement-2.pdf [file NIHMS1517645-supplement-2.pdf]

**Neuron**

**Supplemental Information**

**Differential NOVA2-mediated splicing in excitatory and inhibitory neurons regulates cortical development and cerebellar function**

**Yuhki Saito, Yuan Yuan, Ilana Zucker-Scharff, John J. Fak, Saša Jereb, Yoko Tajima,  
Donny D. Licatalosi, Robert B. Darnell**

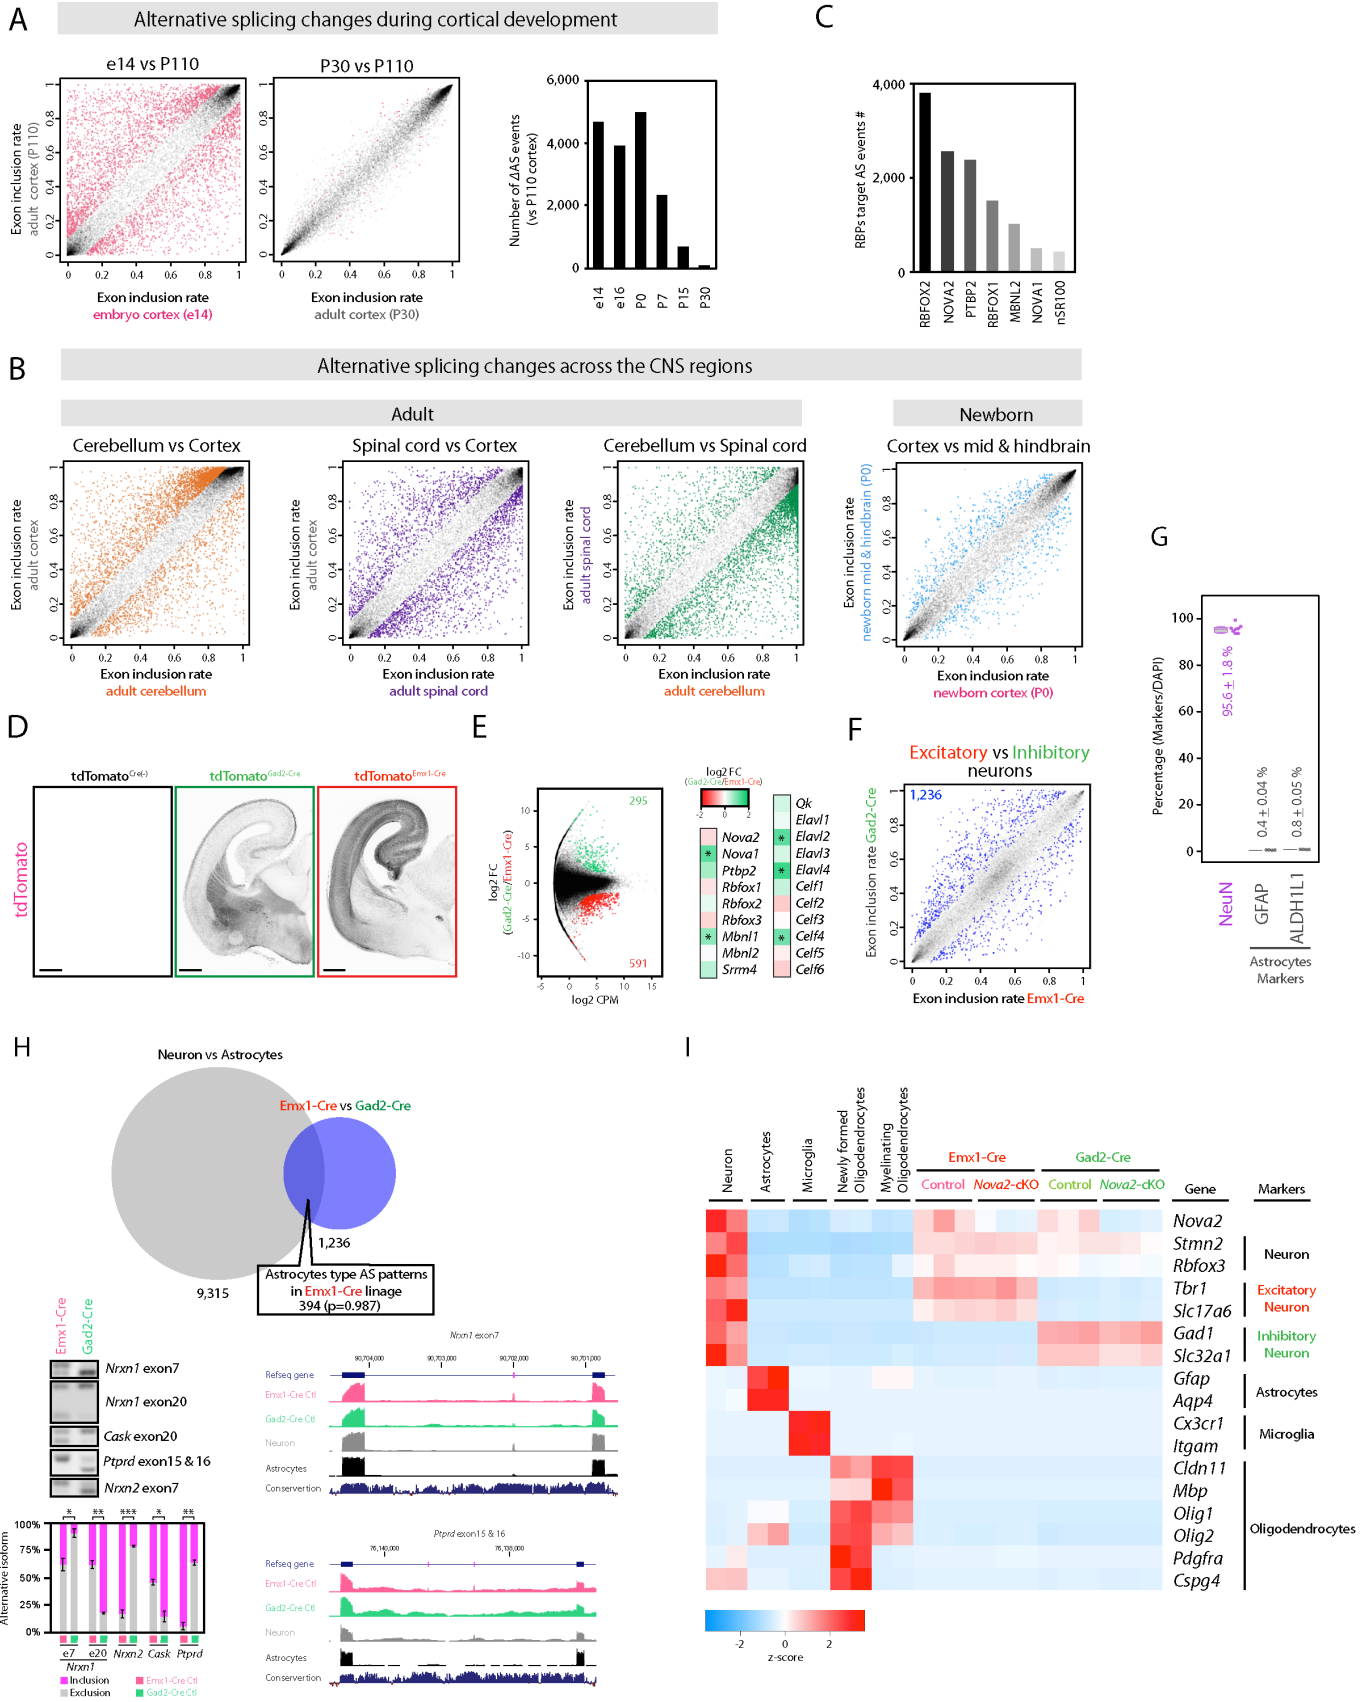

**Figure S1. Related to Figure 1. Diversity of AS across the CNS regions and neuronal types.**

(A) AS changes during mouse cortical development. The examples of developmentally regulated cassette-type AS events in the mouse cortex between e14 or P30 and P110 mouse cortex. *Pink* dot indicates the significantly changed AS events (FDR<0.05,  $|AI| \geq 0.1$ ) (*Left* two scatter plot). Summary of total cassette-type AS number that significantly changed when compared with P110 mouse cortex (FDR<0.05,  $|AI| \geq 0.1$ ) (*right*). (B) AS diversity across the CNS regions. Scatter plots show the exon inclusion rate of cassette-type AS events between the CNS regions. Each *Orange, purple, green, or light blue* dot indicates the significantly changed AS event between adult cortex and cerebellum, adult cortex and spinal cord, adult cerebellum and spinal cord, and newborn cortex and the mixture of midbrain, hindbrain, and cerebellum, respectively (FDR<0.05,  $|AI| \geq 0.1$ ). (C) Total AS events number significantly changing in each RBP-KO mouse brain. AS changes were identified from publically available RNA-seq datasets (FDR<0.05,  $|AI| \geq 0.1$ ). (D) Cre dependent tdTomato expression. tdTomato immunofluorescence staining images in e18.5 brain sections of Control<sup>tdTomato; Cre(-)</sup>, Control<sup>tdTomato; Gad2-Cre</sup>, and Control<sup>tdTomato; Emx1-Cre</sup> mouse. Scale bars: 500  $\mu$ m. (E) RBPs mRNA expression difference between neuronal lineages. Asterisks show the significant changes (FDR<0.05,  $|\log_2FC| \geq 1$ ). (F) AS comparison between e18.5 Gad2-Cre and Emx1-Cre lineage. *Blue* dot indicates a significantly changed AS event determined by RNA-seq (FDR<0.05,  $|AI| \geq 0.1$ ). (G) Count of neuron and non-neuronal cell number in e18.5 cortex. NeuN (neuron marker), GFAP (astrocyte marker), and ALDH1L1 (astrocyte marker) (n $\geq$ 4, counted cell number  $\geq$  77,802 for each). (H) No significant overlap of AS difference between Emx1-Cre vs Gad2-Cre lineage and neuron vs astrocytes (*left*). Examples of AS difference between Emx1-Cre and Gad2-Cre lineage (right, n=3).

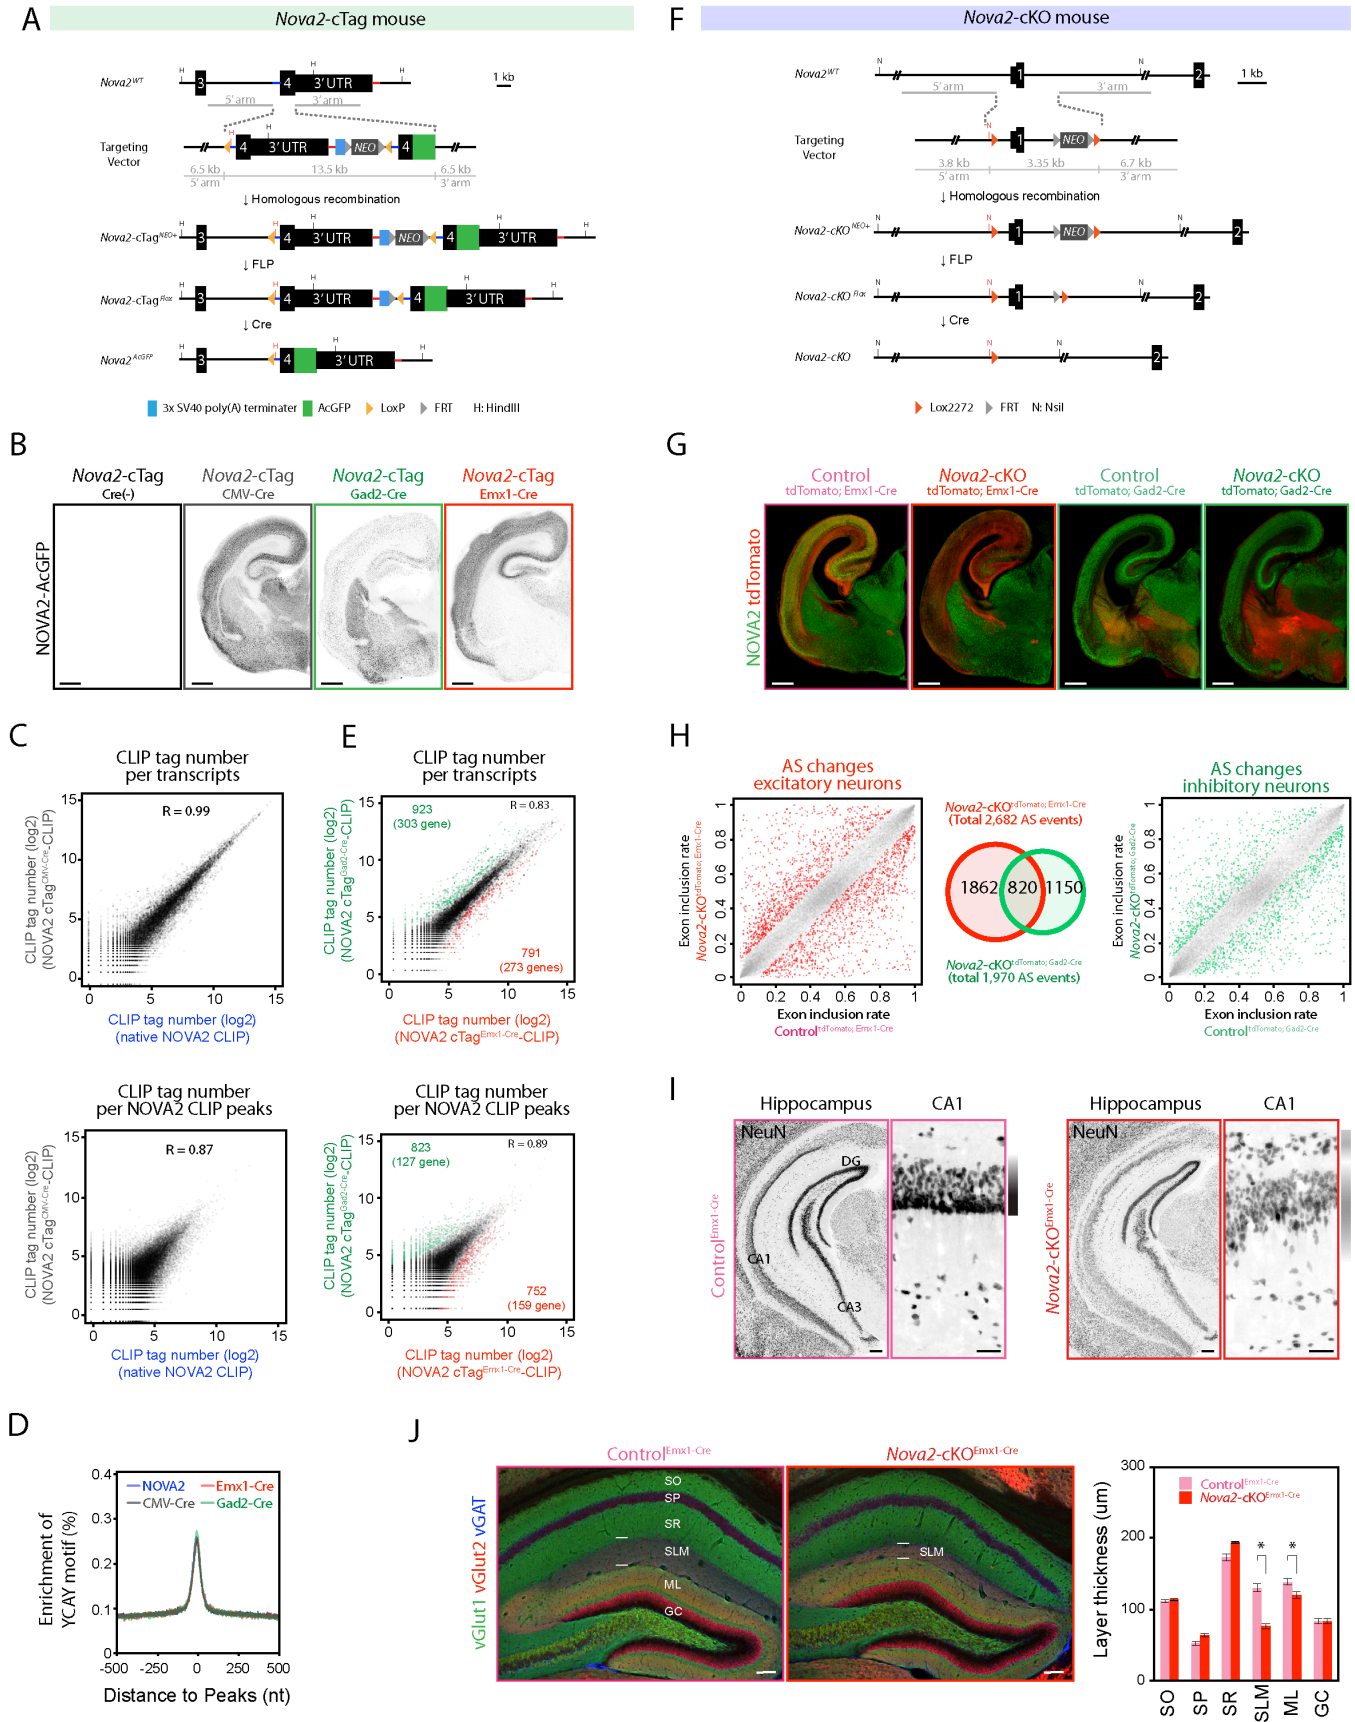

**Figure S2. Related to Figure 2. Mice models development providing neuronal lineage selective and transcriptome-wide NOVA2 analysis.** (A) Targeting strategy for generating the knock-in *Nova2*-cTag mouse. FLP: Flippase. FRT: Flippase recognition target. *NEO*: Neomycin resistance gene. (B) Cre-dependent NOVA2-AcGFP protein expression. NOVA2-AcGFP immunofluorescent staining images with anti-GFP antibody in e18.5 *Nova2*-cTag<sup>Cre(-)</sup>, *Nova2*-cTag<sup>CMV-Cre</sup>, *Nova2*-cTag<sup>Gad2-Cre</sup>, and *Nova2*-cTag<sup>Emx1-Cre</sup> mice brain. Scale bars: 500  $\mu$ m. (C) The comparison of NOVA2 and NOVA2-AcGFP binding property to RNA. Scatter plots show the correlation of read counts between conventional NOVA2-CLIP to NOVA2 cTag<sup>CMV-Cre</sup>-CLIP. Correlation of total CLIP read counts on transcripts (*Left*) and on NOVA2 CLIP peaks (*right*). Each dot represents a transcript (*left*) or CLIP peak (*right*). R: correlation coefficient. (D) Enrichment of YCAAY motif near conventional NOVA2 CLIP and NOVA cTag-CLIP peaks. (E) The comparison of neuronal lineage specific NOVA2 cTag-CLIP between cortical excitatory (*Emx1-Cre*) and inhibitory neurons (*Gad2-Cre*). Scatter plots show the correlation of read counts between NOVA2 cTag<sup>Gad2-Cre</sup>-CLIP to NOVA2 cTag<sup>Emx1-Cre</sup>-CLIP; data are compiled from three biologic replicates of mouse brain E18.5 cortex. Correlation of total CLIP read counts on transcripts (*Left*). Correlation of total CLIP read counts on NOVA2 CLIP peaks (*right*). Each *black* dot represents a comparable transcript (*left*) or CLIP peak (*right*) between two neuronal lineages. Each *green* or *red* dot represents a significantly enriched transcript (*left*) or CLIP peak (*right*) in NOVA2 cTag<sup>Gad2-Cre</sup>-CLIP or NOVA2 cTag<sup>Emx1-Cre</sup>-CLIP, respectively (FDR<0.05,  $|\log_2 FC| \geq 1$ ). R: correlation coefficient. (F) Targeting strategy for generating the *Nova2*-cKO mouse. FLP: Flippase. FRT: Flippase recognition target. *NEO*: Neomycin resistance gene. (G) NOVA2 depletion from selective neuronal populations. NOVA2 (*green*) and tdTomato (*red*) immunofluorescent staining images in the e18.5 Control<sup>tdTomato; Emx1-Cre</sup>, *Nova2*-cKO<sup>tdTomato; Emx1-Cre</sup>, Control<sup>tdTomato; Gad2-Cre</sup>, and *Nova2*-cKO<sup>tdTomato; Gad2-Cre</sup> mice brain. Scale bars: 500  $\mu$ m. (H) NOVA2 mediated AS events in restricted neuronal population. *Left and right* scatter plots show the exon inclusion rate of the e18.5 cortical Control<sup>tdTomato; Emx1-Cre</sup>, *Nova2*-cKO<sup>tdTomato; Emx1-Cre</sup>, Control<sup>tdTomato; Gad2-Cre</sup>, and *Nova2*-cKO<sup>tdTomato; Gad2-Cre</sup>. Each *grey* dot represents an AS event. Each *Red* and *green* dot indicates the significantly changed AS event in *Emx1-Cre* or *Gad2-Cre* lineage, respectively (FDR<0.05,  $|AI| \geq 0.1$ ). *Middle* Venn diagram representing NOVA2 target AS events number overlapping or differentially regulated between two neuronal-lineages. (I) The disorganization of hippocampal laminar structure in *Nova2*-cKO<sup>Emx1-Cre</sup> mice. NeuN immunostaining in the hippocampus of 3 weeks old Control<sup>Emx1-Cre</sup> (*left, pink*) or *Nova2*-cKO<sup>Emx1-Cre</sup> mice (*right, red*). Scale bars: hippocampus; 200  $\mu$ m, CA1; 50  $\mu$ m. (J) CA1 molecular layer disorganization in 3 weeks old *Emx1-Cre; Nova2*-cKO mice. Hippocampal layer visualized by immunostaining with anti-vGlut1, vGlut2, and vGAT antibodies in 3 weeks old Control<sup>Emx1-Cre</sup> or *Nova2*-cKO<sup>Emx1-Cre</sup> mice (*left images*). Quantification and comparison of hippocampal layer thickness between Control<sup>Emx1-Cre</sup> or *Nova2*-cKO<sup>Emx1-Cre</sup> mice (*right*). \*: p<0.05. SO; stratum oriens, SP; apical dendrites stratum pyramidal, SR; stratum radiatum, SLM; stratum lacunosum moleculare, ML; molecular layer, GC; granule cell. Scale bars: 100  $\mu$ m.

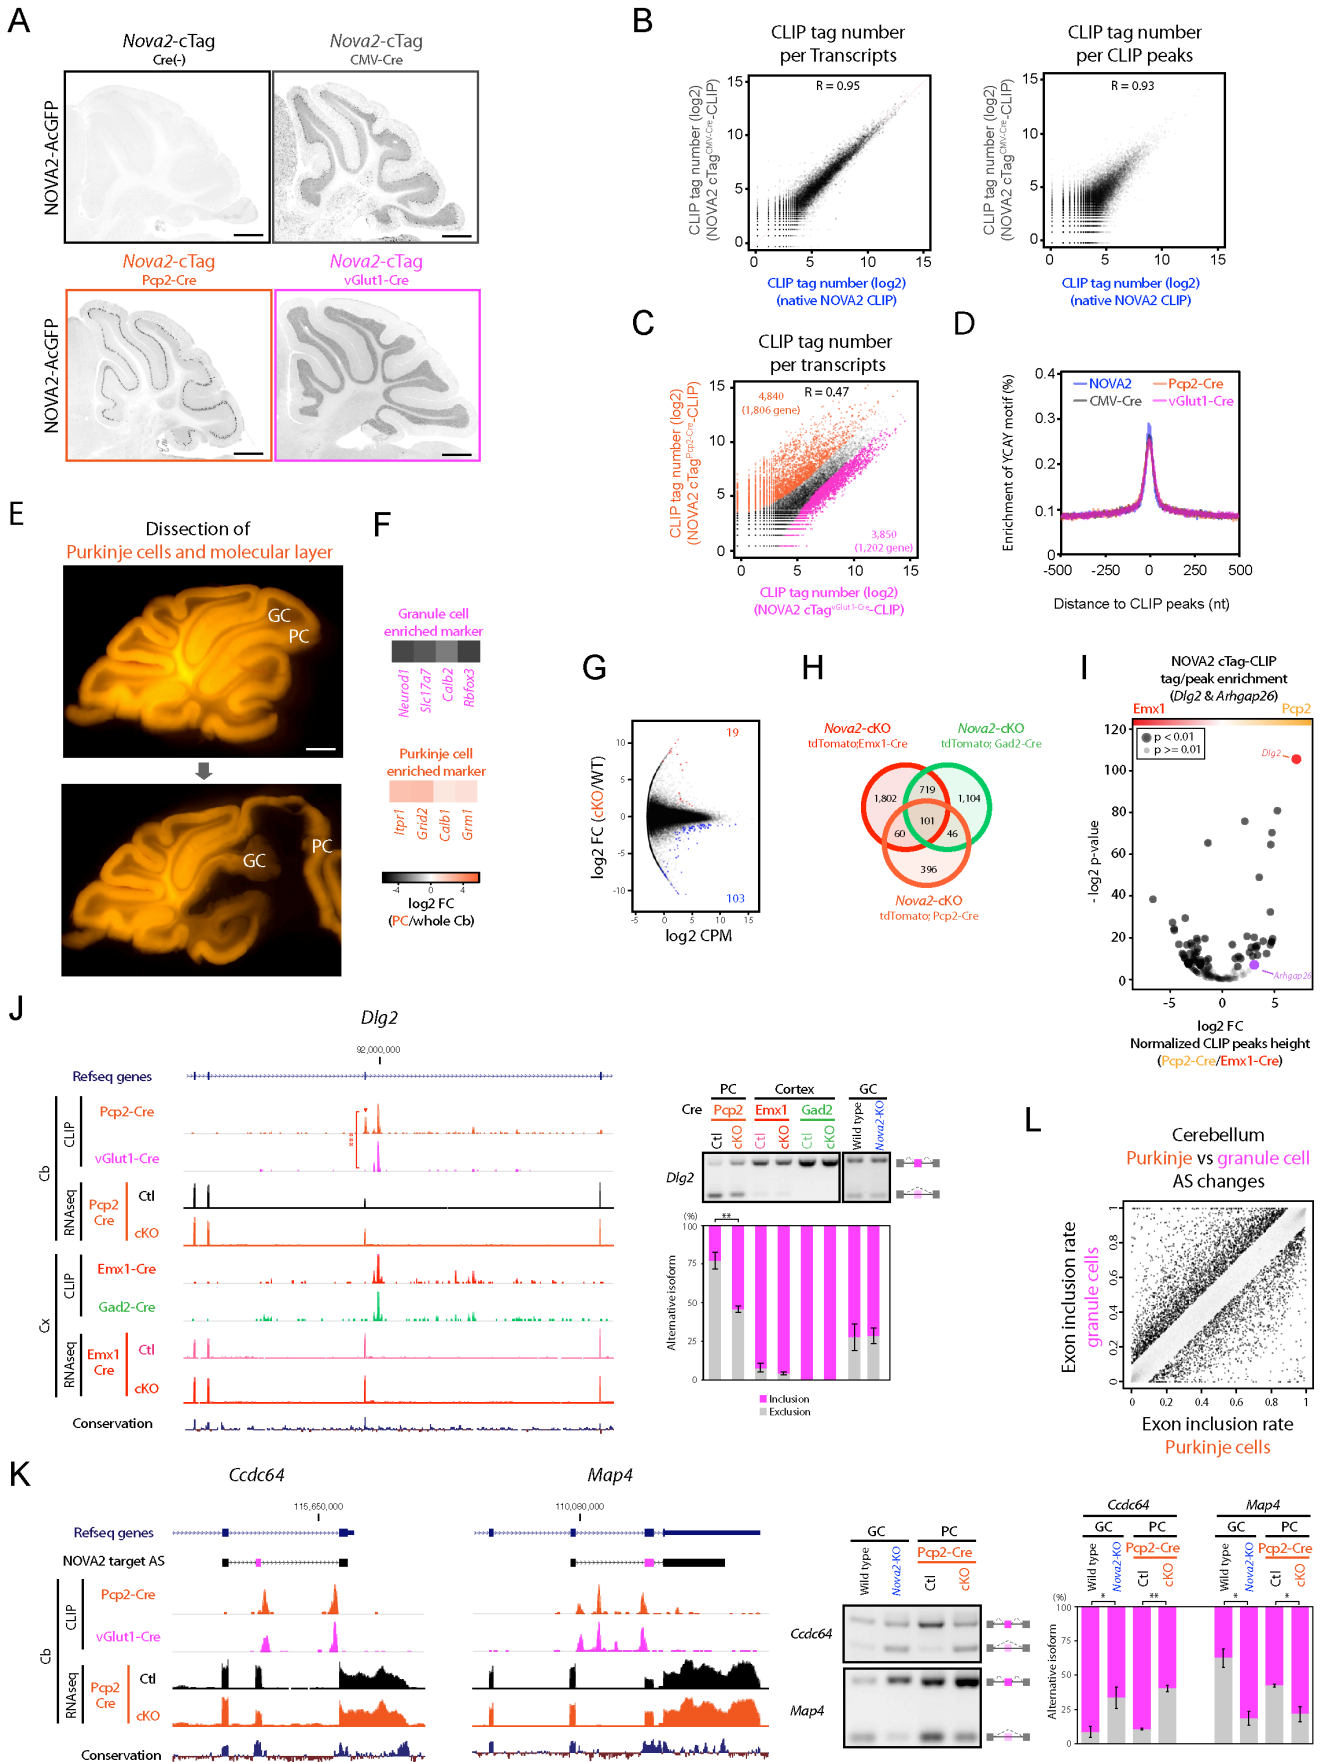

**Figure S3. Related to Figure 3. Neuronal type specific analysis in adult cerebellum.** (A) Cre-dependent NOVA2-AcGFP expression in cerebellum. Mouse brain slices prepared from 4 weeks old *Nova2*-cTag mice mated with CMV-Cre, *Pcp2*-Cre (Purkinje cell), *vGluT1*-Cre (granule cell) driver mice were subjected to immunostaining with anti-GFP antibody. Scale bars: 500  $\mu$ m. (B) The comparison of NOVA2 and NOVA2-AcGFP binding property to RNA in adult cerebellum. Scatter plots show the correlation of read counts between conventional NOVA2-CLIP to NOVA2 cTag-CLIP (CMV-Cre). Correlation of total CLIP read counts on transcripts (*Left*) and on NOVA2 CLIP peaks (*right*). Each dot represents a transcript (*left*) or CLIP peak (*right*). R: correlation coefficient. (C) The comparison of neuronal type specific NOVA2 cTag-CLIP between cerebellar granule (*vGluT1*-Cre) and Purkinje cells (*Pcp2*-Cre). Scatter plot shows the correlation of read counts on CLIP peaks between NOVA2 cTag<sup>*vGluT1*-Cre</sup>-CLIP to NOVA2 cTag<sup>*Pcp2*-Cre</sup>-CLIP. Each *black* dot represents a comparable CLIP peak between two neuronal type. Each *magenta* or *orange* dot represents a significantly enriched CLIP peak in either NOVA2 cTag<sup>*vGluT1*-Cre</sup>-CLIP or cTag<sup>*Pcp2*-Cre</sup>-CLIP, respectively (FDR<0.05,  $|\log_2 \text{FC}| \geq 1$ ). R: correlation coefficient. (D) Enrichment of YCAY motifs around NOVA2 cTag-CLIP peaks. (E) Manual dissection images of Purkinje cell layer from cerebellar slices of Control<sup>*tdTomato*; *Pcp2*-Cre</sup> reporter mice. Scale bars: 500  $\mu$ m. (F) Neuronal-type marker enrichment in and depletion from RNA-seq libraries prepared from dissected out Purkinje cell layer. Purkinje cell enriched markers (*orange*). Granule cell enriched markers (*magenta*). (G) Transcript abundance changes upon NOVA2 depletion from Purkinje cells determined by RNA-seq. Each *black* dot represents a transcript. Each *blue* or *red* dot represents a significantly decreased or increased transcript in the Purkinje cell layer of *Nova2*-cKO<sup>*Pcp2*-Cre</sup> mouse, respectively (n=3, FDR<0.01,  $|\log_2 \text{FC}| \geq 1$ , TPM average  $\geq 2$ ). (H) Venn diagram representing NOVA2 target AS events number overlapping or differentially regulated among three neuronal-lineages. (I and J) (I) NOVA2 cTag-CLIP peak enrichment normalized to RNA abundance and functional NOVA2 protein abundance in *Arhgap26* and *Dlg2*. Each dot indicates an individual NOVA2 CLIP peak (Fisher's exact test). (J) Discovery of PCs selective NOVA2 mediated AS event. UCSC genome browser view of around *Dlg2* AS events (*left*). RT-PCR confirmation of AS change detected by RNA-seq (*right panels*) (n=3). \*\*, p<0.01. (K) Common NOVA2 mediated AS events in PCs and GCs. UCSC genome browser views of *Ccdc64* and *Map4* (*left panels*) and RT-PCR confirmation and quantification of AS changes (*right panels*) (n=3). \*, p<0.05, \*\*, p<0.01 (L) AS changes between Purkinje cells and granule cells. Scatter plot shows the exon inclusion rate of Purkinje cells and granule cells determined by TRAP (Mellén et al., 2012). Each *grey* dot represents a comparative AS event. Each *black* dot indicates a significantly changed AS event (total 6,163 events) (n=4, FDR<0.05,  $|\Delta I| \geq 0.1$ ).

**A** GO functional annotation clustering analysis for Purkinje cell type exon exclusion regulated by NOVA2

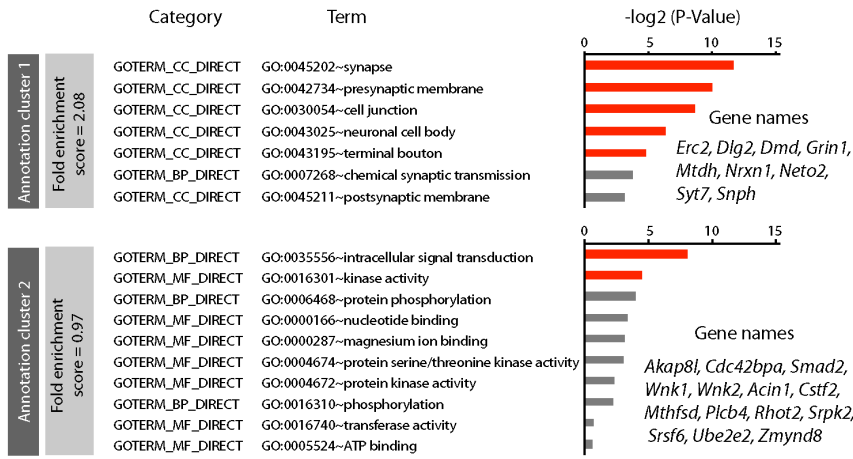

**B**

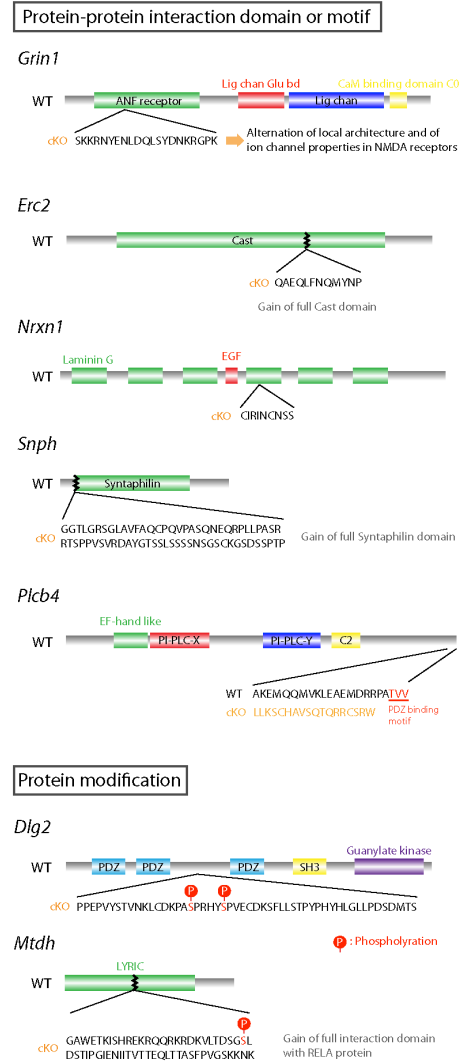

**C**

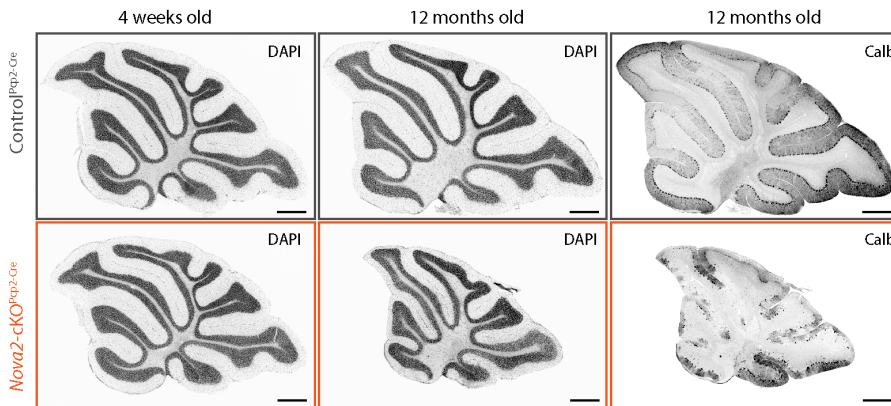

**D**

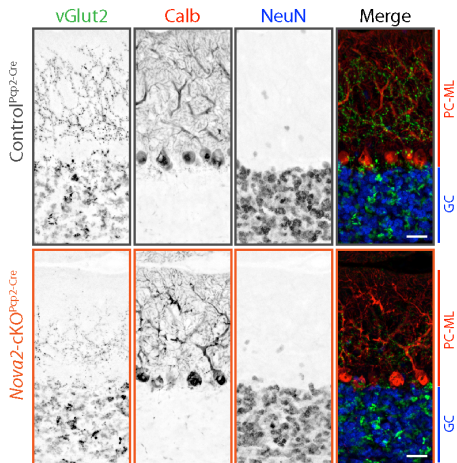

**E**

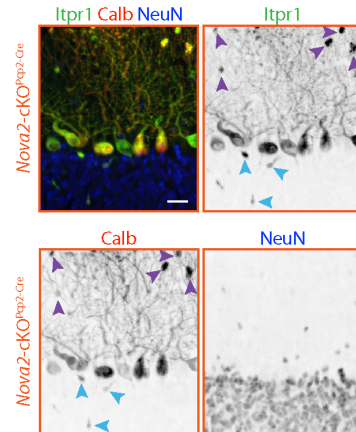

**DNA binding domain**

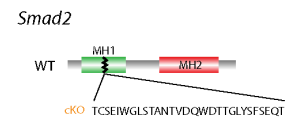

**Insertion of premature stop codon (NMD)**

*Akap8, Srsf6*

**Splicing change in 5' or 3' UTR**

*Neto2, Acin1, Mthfsd, Srpk2, Ube2e2*



**Figure S4. Related to Figure 4. Purkinje cell specific *Nova2* deficiency leads progressive motor discoordination and cerebellar atrophy.** (A) GO functional annotation clustering analysis for the genes used in Figure 3H. *Red bars* represent the GO term having  $p < 0.05$ . (B) Effects of alternative splicing on protein domains, modification, and RNA stoichiometry and regulation. Differential amino acid sequences are listed. (C) Comparative granule cell layer thickness. DAPI staining images in 4 weeks and 12 months old Control<sup>tdTomato; Pcp2-Cre</sup> and *Nova2*-cKO<sup>tdTomato; Pcp2-Cre</sup> and Calbindin D28 immunostaining images at 12 months old. Scale bars: 500  $\mu\text{m}$ . (D) The climbing fiber innervation defect and reduced Purkinje molecular layer thickness upon Purkinje cell specific *Nova2* deficiency. vGlut2 (*green*, climbing fiber terminal marker), calbindin D28 (*red*, Purkinje cells marker), and NeuN (*blue*, granule cell marker) immunofluorescent staining images in the 4 weeks old Control<sup>Pcp2-Cre</sup> and *Nova2*-cKO<sup>Pcp2-Cre</sup>. Scale bars: 25  $\mu\text{m}$ . (E) The swelling Purkinje cell's neurites upon *Nova2* deficiency. ITPR1 (*green*), Caibindin D28 (*red*), and NeuN (*blue*) immunofluorescent staining images from 16 weeks old *Nova2*-cKO<sup>Pcp2-Cre</sup> mouse. *Purple* and *blue* arrowheads represent swelling neurites in molecular layer or granule cell layer, respectively. Scale bars: 25  $\mu\text{m}$ .

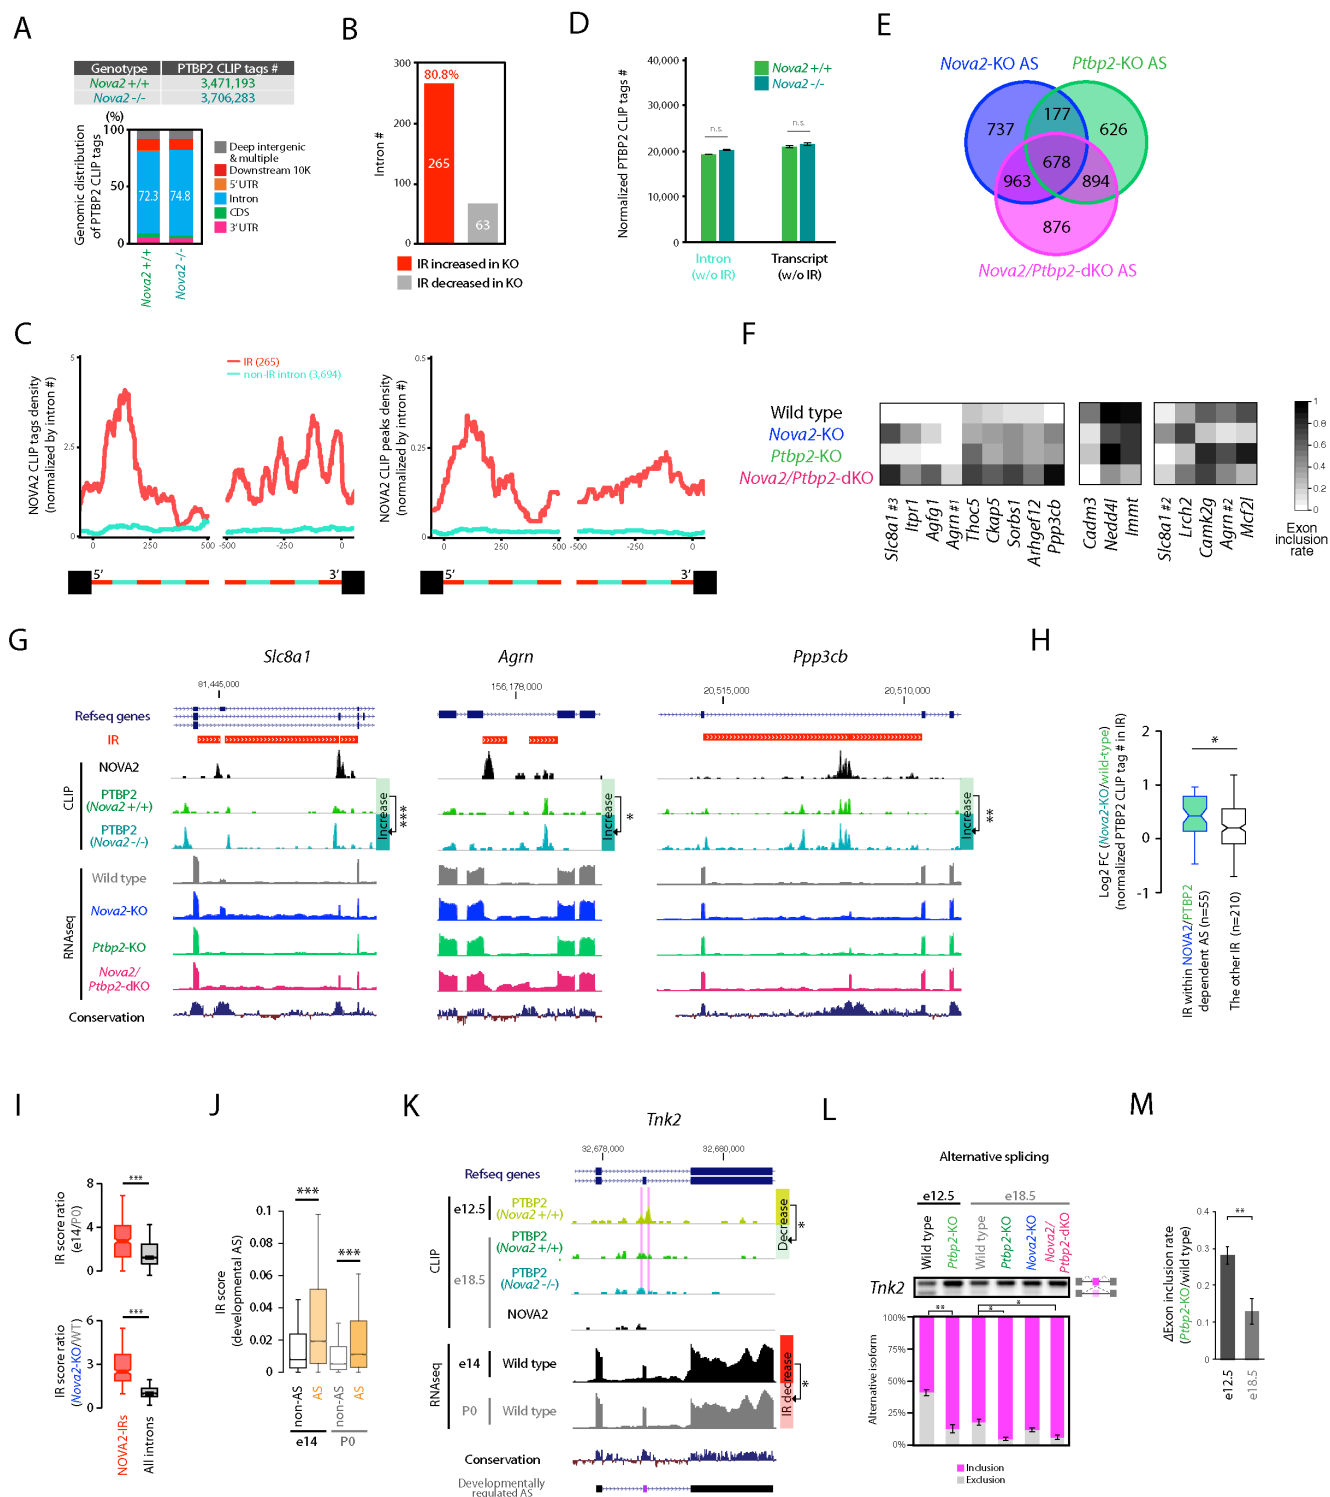

**Figure S5. Related to Figure 5. NOVA2 regulates IR to serve as a *cis*-acting scaffold element for AS factor PTBP2. (A) PTBP2 CLIP results in wild type and *Nova2*-KO mouse. Total PTBP2 unique CLIP tag number from the e18.5 cortex of wild type and *Nova2*-KO mouse (*upper panel*) (three independent**

CLIP experiments used three biological replicates). Genomic distribution of PTBP2 unique CLIP tags (*lower graph*). (B) The number of NOVA2-dependent increased and decreased IR in *Nova2*-KO. (C) NOVA2 CLIP tags or peaks distribution on IR or non-retained intron. Normalized NOVA2 CLIP tag (*upper*) or peak (*lower*) density on IR or non-retained intron. (D) PTBP2 CLIP tag number counted on all introns excepting IR, and full-length transcript excepting IR, which were normalized by total PTBP2 CLIP tag number of each replicate (n=3). Transcripts retaining IR or the other introns from these were subjected to analysis. (E) Venn diagram representing NOVA2, PTBP2, and NOVA2/PTBP2 target AS events number overlapping or differentially regulated among e18.5 cortex of *Nova2*-KO, *Ptbp2*-KO, and *Nova2/Ptbp2*-dKO. (F) Examples of AS changes in *Nova2*-KO, *Ptbp2*-KO, and *Nova2/Ptbp2*-dKO. Heatmaps represent the exon inclusion rate in either NOVA2 or PTBP2, or both absence condition *in vivo*. *Left* 9 columns show the additively or synergistically skipped by NOVA2 and PTBP2 in normal condition. *Middle* 3 columns show the additively or synergistically included by NOVA2 and PTBP2 in wild type. *Right* 5 columns show the attenuated-type AS events which are significantly changed in single-KO mouse but comparative in *Nova2/Ptbp2*-dKO with wild type. (G) UCSC genome browser views of transcripts containing the NOVA2-regulated IR with PTBP2 CLIP peaks changes. (H) Higher fold change of PTBP2 CLIP tag number in NOVA2-dependent IR with NOVA2/PTBP2-dependent AS events. (I) Higher decrease degree of NOVA2-IR as cortical developmental proceeds. \*\*\*;  $p < 0.001$ . (J) Higher intron retention within developmentally regulated alternative splicing events. (K) UCSC genome browser view of developmentally regulated *Tnk2* alternative splicing which independent on NOVA2. (L and M) PTBP2 dependent *Tnk2* AS difference at e12.5 and e18.5.

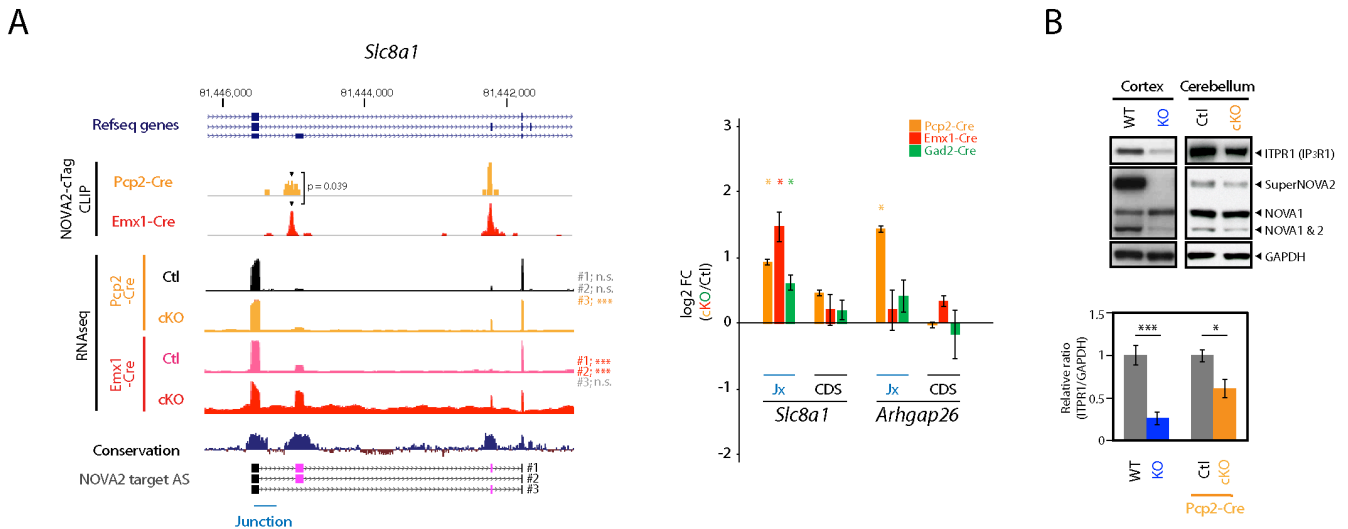

**Figure S6. Related to Figure 6. Multiple NOVA2-mediated target RNA metabolism coupling to IR.** (A) Neuronal subtype selective and NOVA2-dependent AS changes coupling with IR and CLIP peak enrichment. UCSC genome browser views (mm10) of examples (*Slc8a1*) (left). Quantification of transcripts abundance or it retaining exon-intron junction by qPCR (n=3, \*, p<0.05). Orange; Purkinje cells, red; cortical excitatory neurons, green; cortical inhibitory neurons. (B) Decreased ITPR1 protein levels both in the cortex and cerebellum. Immunoblot analysis with anti-ITPR1 antibody in e18.5 cortex of wild type and *Nova2*-KO and in 16 weeks old whole cerebellum of Control<sup>Pcp2-Cre</sup> and *Nova2*-cKO<sup>Pcp2-Cre</sup> (n=3, \*, p<0.05, \*\*\*, p<0.001).

**Table S2. Primers list.** Primer names, sequences, and expected PCR product size were listed. Related to Figure 2,3, and 5.

Genotyping

| Primer_Name            | Sequence                        | wild-type (bp) | mutant (bp) |
|------------------------|---------------------------------|----------------|-------------|
| Emx1-Cre_genotyping1   | AAG GTG TGG TTC CAG AAT CG      | 378            | 102         |
| Emx1-Cre_genotyping2   | CTC TCC ACC AGA AGG CTG AG      |                |             |
| Emx1-Cre_genotyping3   | GCG GTC TGG CAG TAA AAA CTA TC  |                |             |
| Emx1-Cre_genotyping4   | GTG AAA CAG CAT TGC TGT CAC TT  |                |             |
| Gad2-Cre_genotyping1   | CTT CTT CCG CAT GGT CAT CT      | 250            | 352         |
| Gad2-Cre_genotyping2   | AAA GCA ATA GCA TCA CAA ATT TCA |                |             |
| Gad2-Cre_genotyping3   | CAC CCC ACT GGT TTT GAT TT      |                |             |
| CMV-Cre_genotyping1    | GCG GTC TGG CAG TAA AAA CTA TC  | -              | 100         |
| CMV-Cre_genotyping2    | GTG AAA CAG CAT TGC TGT CAC TT  |                |             |
| Pcp2-Cre_genotyping1   | GCG GTC TGG CAG TAA AAA CTA TC  | -              | 100         |
| Pcp2-Cre_genotyping2   | GTG AAA CAG CAT TGC TGT CAC TT  |                |             |
| vGlut1-Cre_genotyping1 | ATGAGCGAGGAGAAGTGTGG            | 218            | 344         |
| vGlut1-Cre_genotyping2 | GTGGAAGTCCTGAAACTGC             |                |             |
| vGlut1-Cre_genotyping3 | CCCTAGGAATGCTCGTCAAG            |                |             |
| Rosa-tdTomato_geno1    | AAG GGA GCT GCA GTG GAG TA      | 297            | 196         |
| Rosa-tdTomato_geno2    | CCG AAA ATC TGT GGG AAG TC      |                |             |
| Rosa-tdTomato_geno3    | GGC ATT AAA GCA GCG TAT CC      |                |             |
| Rosa-tdTomato_geno4    | CTG TTC CTG TAC GGC ATG G       |                |             |
| Nova2-cTag_genotyping1 | CAGAGCTCACACAGGCAGAAGTTGG       | 126            | 164         |
| Nova2-cTag_genotyping2 | CTTATCTCTGGGACCTGAAATGTCTCTACG  |                |             |
| Nova2-cKO_genotyping1  | GAGCCTCGCGTCTTATTATACCC         | 130            | 168         |
| Nova2-cKO_genotyping2  | GCAGTCAAGGCCACGCCCT             |                |             |

RT-PCR (Alternative splicing)

| Primer_Name          | Sequence                      |
|----------------------|-------------------------------|
| Nrxn1_AS1_e7_F       | gaagcactagtgagcctgtgaat       |
| Nrxn1_AS1_e7_R       | gtgtaatcttctgctgtagcccg       |
| Nrxn1_AS2_e20_F      | caaggagtggtagcaatgcca         |
| Nrxn1_AS2_e20_R      | cctgctctttcccgaattat          |
| Nrxn2_AS_e7_F        | tggaaccgtcaatggcaagttc        |
| Nrxn2_AS_e7_R        | agaagaagtcacagagcccagca       |
| Ptprd_AS_exon15-16_F | gcgtaatccggatccagaaatcac      |
| Ptprd_AS_exon15-16_R | ctctgttcgatctgcagcgctc        |
| Dab1-AS_F            | CCGTGATCCTGAAACAGAAGAGAACATT  |
| Dab1-AS_R            | AGCAGCAGTGCCGAAAGACATAGA      |
| Cask-AS_F            | GGCGATGTATCAACAGAGAAACTGGG    |
| Cask-AS_R            | ATGTGTGGATGCTTCAGCATATGACAG   |
| Arhgap26-AS_F        | CTAGCAGCAGCCTGCAGCCCAATCTGAAT |
| Arhgap26-AS_R        | AAGACGGTGCCCGCTGTGAAGGAGAG    |
| Dlg2_AS_exon10_F     | catctactgtctgtaacaatggcaca    |
| Dlg2_AS_exon10_R     | agttgcagtactgtctggtgg         |

|                     |                             |
|---------------------|-----------------------------|
| ltpr1-AS1_F         | TCCTCTGGCAATCTTAGACTGTGTCC  |
| ltpr1-AS1_R         | GAAGCCTCCTCCCCGAGC          |
| ltpr1-AS2_F         | ACAGCCCTGAACTGGCGGTTATC     |
| ltpr1-AS2_R         | GAACATCCACGAGCACAGACAGCT    |
| Mcf2l-AS_F          | CACAAAAGGGAACACAAGAAATGTCA  |
| Mcf2l-AS_R          | CAGCTTCTTAGGGCCCACTCCAC     |
| Gphn_AS1_exon8_F    | Cagtggtagcttcaacagaagatagtt |
| Gphn_AS1_exon8_R    | aggagtagtgctaagggaggctg     |
| Gphn_AS2_exon9-11_F | cagcctcccttagcactactcct     |
| Gphn_AS2_exon9-11_R | ggctcttagaatgttctcttgctgc   |
| Tnk2_AS_F           | tcctgacctgctgagtgagg        |
| Tnk2_AS_R           | ctcaggccaagcctcttgaag       |
| MAP4_AS_F           | gcccaagccaagtgaggatc        |
| MAP4_AS_R           | catttgcccgaacgtcagc         |
| Ccdc64_AS_F         | aaactgaacctctcagcagc        |
| Ccdc64_AS_R         | ctgaagaaggagaagagccgttt     |

qPCR (IR and CDS)

| Primer_Name         | Sequence                                                  |
|---------------------|-----------------------------------------------------------|
| ltpr1-CDS-qPCR_F    | GCGTTTCCACTGGAGAGAATGCTC                                  |
| ltpr1-CDS-qPCR_R    | GTCTGTGCAAACCTCTCCTTAATTCATC                              |
| Mcf2l-CDS-qPCR_F    | ggctgtgaacgactccatgca                                     |
| Mcf2l-CDS-qPCR_R    | gcttgaacctggctagctcct                                     |
| Gphn-CDS-qPCR_F     | ctggaggaacggggttgca                                       |
| Gphn-CDS-qPCR_R     | tccacacactggcttagagagcat                                  |
| Arhgap26-CDS-qPCR_F | ggccaatgttgtaacaaccacaa                                   |
| Arhgap26-CDS-qPCR_R | ttccgggacaggtgtagctgg                                     |
| Slc8a1-CDS-qPCR_F   | tccattgctgcatctaccatgcg                                   |
| Slc8a1-CDS-qPCR_R   | gctcacctctattctggcctc                                     |
| Actb-CDS_F          | GCTGTGCTGTCCCTGTATGCCTCT                                  |
| Actb-CDS_R          | CTCAGCTGTGGTGGTGAAGC                                      |
| ltpr1-junction1_F   | TGGAGATGTCAAGACCAGGATGTTCTG                               |
| ltpr1-junction1_R   | GAAGCCTCCTCCCCGAGC (Same with ltpr1-AS1_R)                |
| ltpr1-junction2_F   | ACAGCCCTGAACTGGCGGTTATC (Same with ltpr1-AS2_F)           |
| ltpr1-junction2_R   | CACAGTGTGAGGAGGCCTATGCC                                   |
| Mcf2l-junction_F    | CACAAAAGGGAACACAAGAAATGTCA (Same with Mcf2l-AS_F)         |
| Mcf2l-junction_R    | ccttctatgtgaccagtgctga                                    |
| Arhgap26-junction_F | GAGAATTGTGGCTTCTTAGAGCGTGT                                |
| Arhgap26-junction_R | AAGACGGTGCCCGCTGTGAAGGAGAG (Same with Arhgap26-AS_R)      |
| Slc8a1-junction_F   | ACCTTCTTCATTGAGATTGGAGAGCC                                |
| Slc8a1-junction_R   | ccactgatgccacagcgaaa                                      |
| Gphn-junction1_F    | Cagtggtagcttcaacagaagatagtt (Same with Gphn_AS1_exon8_F)  |
| Gphn-junction1_R    | Ctgtaccaggagagaggcattgat                                  |
| Gphn-junction2_F    | Cctgggctgatctcagattcacat                                  |
| Gphn-junction2_R    | Ggctcttagaatgttctcttgctgc (Same with Gphn_AS2_exon9-11_R) |

**Table S3. NOVA2 cTag-CLIP and RNA-seq lists used in this study.** Mouse genotype, age, tissue, obtained unique CLIP tag number, Accession number, and references were listed. Related to Figure 1-3, and 5-6.

| CLIP: GSE103316                          |                                                           |       |                      |                |
|------------------------------------------|-----------------------------------------------------------|-------|----------------------|----------------|
| CLIP_name                                | Mouse_Genotype                                            | age   | Tissue (# of tissue) | CLIP.uniq.tag# |
| NOVA2 cTag <sup>CMV-Cre</sup> -CLIP_1    | CMV-Cre <sup>+/-</sup> ; Nova2-cTag <sup>Flox/wt</sup>    | e18.5 | Cortex (2)           | 1,112,127      |
| NOVA2 cTag <sup>CMV-Cre</sup> -CLIP_2    | CMV-Cre <sup>+/-</sup> ; Nova2-cTag <sup>Flox/wt</sup>    | e18.5 | Cortex (2)           | 605,981        |
| NOVA2 cTag <sup>CMV-Cre</sup> -CLIP_3    | CMV-Cre <sup>+/-</sup> ; Nova2-cTag <sup>Flox/wt</sup>    | e18.5 | Cortex (2)           | 1,138,717      |
| NOVA2 cTag <sup>Gad2-Cre</sup> -CLIP_1   | Gad2-Cre <sup>+/-</sup> ; Nova2-cTag <sup>Flox/wt</sup>   | e18.5 | Cortex (3)           | 484,733        |
| NOVA2 cTag <sup>Gad2-Cre</sup> -CLIP_2   | Gad2-Cre <sup>+/-</sup> ; Nova2-cTag <sup>Flox/wt</sup>   | e18.5 | Cortex (3)           | 665,816        |
| NOVA2 cTag <sup>Gad2-Cre</sup> -CLIP_3   | Gad2-Cre <sup>+/-</sup> ; Nova2-cTag <sup>Flox/wt</sup>   | e18.5 | Cortex (3)           | 533,227        |
| NOVA2 cTag <sup>Emx1-Cre</sup> -CLIP_1   | Emx1-Cre <sup>+/-</sup> ; Nova2-cTag <sup>Flox/wt</sup>   | e18.5 | Cortex (3)           | 447,882        |
| NOVA2 cTag <sup>Emx1-Cre</sup> -CLIP_2   | Emx1-Cre <sup>+/-</sup> ; Nova2-cTag <sup>Flox/wt</sup>   | e18.5 | Cortex (3)           | 826,576        |
| NOVA2 cTag <sup>Emx1-Cre</sup> -CLIP_3   | Emx1-Cre <sup>+/-</sup> ; Nova2-cTag <sup>Flox/wt</sup>   | e18.5 | Cortex (3)           | 402,321        |
| NOVA2 CLIP_1                             | Wild type                                                 | P28   | Cerebellum (2)       | 618,550        |
| NOVA2 CLIP_2                             | Wild type                                                 | P28   | Cerebellum (2)       | 436,857        |
| NOVA2 CLIP_3                             | Wild type                                                 | P28   | Cerebellum (2)       | 371,590        |
| NOVA2 cTag <sup>CMV-Cre</sup> -CLIP_1    | CMV-Cre <sup>+/-</sup> ; Nova2-cTag <sup>Flox/wt</sup>    | P28   | Cerebellum (3)       | 148,516        |
| NOVA2 cTag <sup>CMV-Cre</sup> -CLIP_2    | CMV-Cre <sup>+/-</sup> ; Nova2-cTag <sup>Flox/wt</sup>    | P28   | Cerebellum (3)       | 979,110        |
| NOVA2 cTag <sup>CMV-Cre</sup> -CLIP_3    | CMV-Cre <sup>+/-</sup> ; Nova2-cTag <sup>Flox/wt</sup>    | P28   | Cerebellum (3)       | 758,256        |
| NOVA2 cTag <sup>vGlut1-Cre</sup> -CLIP_1 | vGlut1-Cre <sup>+/-</sup> ; Nova2-cTag <sup>Flox/wt</sup> | P28   | Cerebellum (3)       | 141,263        |
| NOVA2 cTag <sup>vGlut1-Cre</sup> -CLIP_2 | vGlut1-Cre <sup>+/-</sup> ; Nova2-cTag <sup>Flox/wt</sup> | P28   | Cerebellum (3)       | 1,071,274      |
| NOVA2 cTag <sup>vGlut1-Cre</sup> -CLIP_3 | vGlut1-Cre <sup>+/-</sup> ; Nova2-cTag <sup>Flox/wt</sup> | P28   | Cerebellum (3)       | 711,719        |
| NOVA2 cTag <sup>Pcp2-Cre</sup> -CLIP_1   | Pcp2-Cre <sup>+/-</sup> ; Nova2-cTag <sup>Flox/wt</sup>   | P28   | Cerebellum (7)       | 268,648        |
| NOVA2 cTag <sup>Pcp2-Cre</sup> -CLIP_2   | Pcp2-Cre <sup>+/-</sup> ; Nova2-cTag <sup>Flox/wt</sup>   | P28   | Cerebellum (7)       | 475,913        |
| NOVA2 cTag <sup>Pcp2-Cre</sup> -CLIP_3   | Pcp2-Cre <sup>+/-</sup> ; Nova2-cTag <sup>Flox/wt</sup>   | P28   | Cerebellum (7)       | 497,991        |
| PTBP2 CLIP_wt_1                          | Wild type                                                 | e18.5 | Cortex (1)           | 1,241,813      |
| PTBP2 CLIP_wt_2                          | Wild type                                                 | e18.5 | Cortex (1)           | 942,468        |
| PTBP2 CLIP_wt_3                          | Wild type                                                 | e18.5 | Cortex (1)           | 1,289,458      |
| PTBP2 CLIP_Nova2-KO_1                    | Nova2-KO                                                  | e18.5 | Cortex (1)           | 990,027        |
| PTBP2 CLIP_Nova2-KO_2                    | Nova2-KO                                                  | e18.5 | Cortex (1)           | 1,462,221      |
| PTBP2 CLIP_Nova2-KO_3                    | Nova2-KO                                                  | e18.5 | Cortex (1)           | 1,256,337      |
| PTBP2 CLIP_wt_1                          | Wild type                                                 | e12.5 | Cortex (4)           | 826,934        |
| PTBP2 CLIP_wt_2                          | Wild type                                                 | e12.5 | Cortex (4.5)         | 1,073,842      |
| PTBP2 CLIP_wt_3                          | Wild type                                                 | e12.5 | Cortex (4.5)         | 884,118        |
| RBPs_Name                                | Reference                                                 | age   | Tissue               | Accession #    |
| NOVA2                                    | Saito et al., 2016, eLIFE                                 | e18.5 | Cortex               | GSE69711       |
| RBFOX1/2/3                               | Weyn-Vanhentenryck et al., 2014                           | P15   | Whole Brain          | SRP035321      |
| MBNL1                                    | Wang et al., 2012                                         | 16 W  | Whole Brain          | GSE39911       |
| nSR100/SRRM4                             | Raj et al., 2014                                          |       | N2a cells            | GSE57278       |

| RNA-seq                      |        |                                   |             |                                |
|------------------------------|--------|-----------------------------------|-------------|--------------------------------|
| Mouse                        | Age    | Tissues                           | Accession # | References                     |
| Wild type                    | e14    | Cortex                            | SRP055008   | Yan et al., 2015               |
| Wild type                    | e16    |                                   |             |                                |
| Wild type                    | P0     |                                   |             |                                |
| Wild type                    | P7     |                                   |             |                                |
| Wild type                    | P15    |                                   |             |                                |
| Wild type                    | P30    |                                   |             |                                |
| Wild type                    | P110   |                                   |             |                                |
| Wild type                    | P60    | Cerebellum                        | GSE60731    | Frank et al., 2015             |
| Wild type                    | P90    | Spinal Cord                       | GSE103316   | This paper                     |
| Nova1-control                | P0     | Midbrain & hindbrain & cerebellum | GSE69711    | Saito et al., 2016             |
| Nova1-KO                     | P0     | Midbrain & hindbrain & cerebellum |             |                                |
| Nova2-control_Ribozero       | e18.5  | Cortex                            | GSE69711    | Saito et al., 2016             |
| Nova2-KO_Ribozero            | e18.5  | Cortex                            |             |                                |
| Nova2-control_Poly(A)+       | e18.5  | Cortex                            | GSE103316   | This paper                     |
| Nova2-KO_Poly(A)+            | e18.5  | Cortex                            | GSE103316   | This paper                     |
| Ptbp2-KO                     | e18.5  | Cortex                            | GSE94054    | Hwang et al., 2017             |
| Nova2/Ptbp2-dKO              | e18.5  | Cortex                            | GSE103316   | This paper                     |
| Rbfox1-control               | 1 M    | Whole brain                       | SRP030031   | Lovci et al., 2013             |
| Rbfox1-KO                    |        |                                   |             |                                |
| Rbfox2-control               |        |                                   |             |                                |
| Rbfox2-KO                    |        |                                   |             |                                |
| nSR100/SRR4-control          | e18.5  | Cortex                            | GSE65818    | Quesnel-Vallieres et al., 2015 |
| nSR100/SRR4-KO               |        |                                   |             |                                |
| Mbnl2-control                | 2-3 M  | Hippocampus                       | GSE38497    | Charizanis K, et al., 2012     |
| Mbnl2-KO                     |        |                                   |             |                                |
| TRAP.granule_cells           | 7-11 W | Cerebellum                        | GSE42880    | Mellén et al., 2012            |
| TRAP.Purkinje_cells          |        |                                   |             |                                |
| Control; tdTomato;Emx1-Cre   | e18.5  | Cortex_tdTomato+(FACS)            | GSE103316   | This paper                     |
| Nova2-cKO; tdTomato;Emx1-Cre | e18.5  | Cortex_tdTomato+(FACS)            |             |                                |
| Control; tdTomato;Gad2-Cre   | e18.5  | Cortex_tdTomato+(FACS)            |             |                                |
| Nova2-cKO; tdTomato;Gad2-Cre | e18.5  | Cortex_tdTomato+(FACS)            |             |                                |
| Control; tdTomato;Pcp2-Cre   | P28    | Cerebellum_Purkinje cell layer    |             |                                |
| Nova2-cKO; tdTomato;Pcp2-Cre | P28    | Cerebellum_Purkinje cell layer    |             |                                |
